# Supplementary material for: Synthesis of spiro[indolenine]-methanofullerenes via Deoxofluor promoted deoxygenative cyclopropanation of 1,2-(3-indole)-fullerenols
Source: Royal Society of Chemistry journal article supplement (doi:10.1039/d3ob01697h), 2023-01-01
Supplement: d3ob01697h1.pdf [file d3ob01697h1.pdf]

# Electronic Supplementary Information

## Synthesis of spiro[indolenine]-methanofullerenes via Deoxofluor promoted deoxidated cyclopropanation of 1,2-(3-indole)fullerenols

Wen-Bin Ma, long-Ge Wang, Shou-Rui Chen, Xiang Zhang, Jun Xuan and Fei Li\*

*Department of Chemistry, Anhui University; Key Laboratory of Structure and Functional Regulation of Hybrid Materials (Anhui University), Ministry of Education; Anhui Province Key Laboratory of Chemistry for Inorganic/Organic Hybrid Functionalized Materials and Key Laboratory of Functional Inorganic Materials of Anhui Province, Hefei, Anhui 230601, People's Republic of China*

[lfe@ahu.edu.cn](mailto:lfe@ahu.edu.cn)

|                                                                         |         |
|-------------------------------------------------------------------------|---------|
| General Methods                                                         | S2      |
| 1. Experimental Procedures and Spectral Data of <b>2a-2e</b>            | S2-S4   |
| 2. NMR Spectra of <b>2a-2e</b>                                          | S5-S9   |
| <sup>1</sup> H NMR and <sup>13</sup> C NMR spectra of product <b>2a</b> | S5      |
| <sup>1</sup> H NMR and <sup>13</sup> C NMR spectra of product <b>2b</b> | S6      |
| <sup>1</sup> H NMR and <sup>13</sup> C NMR spectra of product <b>2c</b> | S7      |
| <sup>1</sup> H NMR and <sup>13</sup> C NMR spectra of product <b>2d</b> | S8      |
| <sup>1</sup> H NMR and <sup>13</sup> C NMR spectra of product <b>2e</b> | S9      |
| 3. Single-Crystal X-Ray Crystallography of <b>2a</b>                    | S10-S11 |
| 4. UV-vis absorption spectra of compounds <b>2a-2e</b>                  | S11     |

## General Methods

Deoxofluor and solvents were obtained from commercial suppliers and used without further purification. 1,2-(3-indole)fullerenols **1a-1e** were prepared according to our previous work (reference 8c, *Org. Lett.*, 2021, 23, 1302-1308). All reactions were carried out using a standard Schlenk technique under an argon or nitrogen atmosphere. <sup>1</sup>H NMR and proton-decoupled <sup>13</sup>C NMR spectra were recorded on 400 MHz (400 MHz for <sup>1</sup>H NMR, 100 MHz for <sup>13</sup>C NMR), and 600 MHz (600 MHz for <sup>1</sup>H NMR, 150 MHz for <sup>13</sup>C NMR) NMR spectrometers. <sup>1</sup>H NMR spectra were referenced to residual DMSO at 2.50 ppm and residual acetone at 2.05 ppm, and <sup>13</sup>C NMR spectra were referenced to residual DMSO at 39.52 ppm and residual acetone at 29.85 ppm. Column chromatography was carried out employing silica gel G.

## 1. Experimental Procedures and Spectral Data of 2a-2e

### Synthesis of 2a

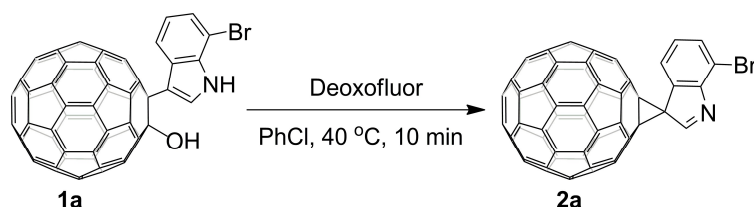

**1a** (18.6 mg, 0.02 mmol), Deoxofluor (36  $\mu$ L, 0.20 mmol) were dissolved in chlorobenzene (5 mL) at 40°C under N<sub>2</sub> atmosphere. After 10 minutes of reaction, the color of the solution changed gradually from brown to deep red. Then, petroleum ether was added to the mixture to precipitate the product. The residue was separated on a silica gel column with carbon disulfide/dichloromethane (2:1) as the eluent to give unreacted **1a** (1.3 mg) and **2a** (14.8 mg, 81 %) as black amorphous solid. <sup>1</sup>H NMR (400 MHz, CS<sub>2</sub>/d<sub>6</sub>-acetone)  $\delta$  9.01 (d,  $J$  = 8.8 Hz, 1H), 8.24 (d,  $J$  = 7.2 Hz, 1H), 7.77-7.72 (m, 2H); <sup>13</sup>C NMR (150 MHz, CS<sub>2</sub>/d<sub>6</sub>-acetone) (all 2C unless indicated)  $\delta$  166.45, 156.74, 148.12, 146.04, 145.99, 145.95, 145.70, 145.54, 145.53, 145.47, 145.43, 145.40, 145.35, 145.28, 145.02, 144.53, 143.80, 143.78, 143.71, 143.67, 142.78, 142.67, 142.15, 141.99, 139.33, 138.10, 135.70, 133.32, 125.97, 124.4, 121.81, 74.50, 50.51. FT-IR  $\nu$ /cm<sup>-1</sup> (KBr) 1540, 1508, 1458, 1411, 1185, 1132, 861, 772, 740, 697, 548, 523; UV-vis (CHCl<sub>3</sub>)  $\lambda_{\text{max}}$ /nm 383, 430, 456, 686; HRMS (MALDI-TOF-MS, DCTB as matrix, negative mode):  $m/z$  [M]<sup>-</sup> calcd for C<sub>68</sub>H<sub>4</sub>BrN 912.9527; found 912.9532.

### Synthesis of 2b

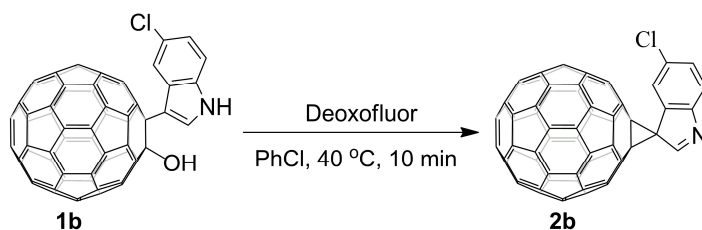

**1b** (17.8 mg, 0.02 mmol), Deoxofluor (36  $\mu$ L, 0.20 mmol) were dissolved in

chlorobenzene (5 mL) at 40°C under N<sub>2</sub> atmosphere. After 10 minutes of reaction, the color of the solution changed gradually from brown to deep red. Then, petroleum ether was added to the mixture to precipitate the product. The residue was separated on a silica gel column with carbon disulfide/dichloromethane (2:1) as the eluent to give unreacted **1b** (1.1 mg) and **2b** (13.5 mg, 76 %) as black amorphous solid. <sup>1</sup>H NMR (400 MHz, CS<sub>2</sub>/d<sub>6</sub>-acetone) δ 9.09 (s, 1H), 8.17 (s, 1H), 7.88(d, *J* = 8 Hz, 1H), 7.63(d, *J* = 8.4 Hz, 1H); <sup>13</sup>C NMR (150 MHz, CS<sub>2</sub>/d<sub>6</sub>-acetone) (all 2C unless indicated) δ 166.65, 156.39, 148.20, 146.10, 146.07, 146.00, 145.78, 145.60, 145.57, 145.46, 145.40, 145.35, 144.59, 143.86, 143.83, 143.76, 143.72, 142.84, 142.7, 142.18, 142.03, 139.42, 138.21, 135.44, 133.62, 130.40, 124.10, 123.25, 74.57, 50.63. FT-IR ν/cm<sup>-1</sup> (KBr) 1542, 1508, 1458, 1427, 1189, 1156, 861, 816, 742, 703, 552, 524; UV-vis (CHCl<sub>3</sub>) λ<sub>max</sub>/nm 385, 431, 454, 687; HRMS (MALDI-TOF-MS, DCTB as matrix, negative mode): m/z [M]<sup>-</sup> calcd for C<sub>68</sub>H<sub>4</sub>ClN 869.0032; found 869.0038.

### Synthesis of 2c

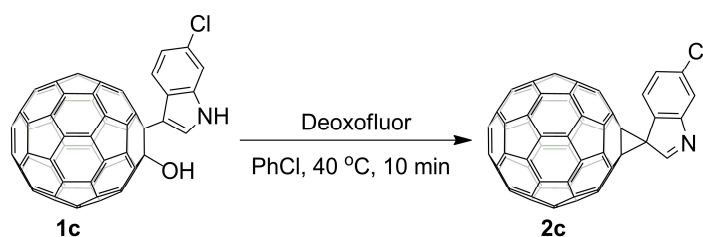

**1c** (17.8 mg, 0.02 mmol), Deoxofluor (36 μL, 0.20 mmol) were dissolved in chlorobenzene (5 mL) at 40°C under N<sub>2</sub> atmosphere. After 10 minutes of reaction, the color of the solution changed gradually from brown to deep red. Then, petroleum ether was added to the mixture to precipitate the product. The residue was separated on a silica gel column with carbon disulfide/dichloromethane (2:1) as the eluent to give unreacted **1c** (1.2 mg) and **2c** (12.3 mg, 71 %) as black amorphous solid. <sup>1</sup>H NMR (400 MHz, CS<sub>2</sub>/d<sub>6</sub>-acetone) δ 9.15 (s, 1H), 8.21 (d, *J* = 8 Hz, 1H), 7.90 (s, 1H), 7.49 (d, *J* = 8.4 Hz, 1H); <sup>13</sup>C NMR (150 MHz, CS<sub>2</sub>/d<sub>6</sub>-acetone) (all 2C unless indicated) δ 168.01, 158.96, 148.25, 146.25, 146.08, 146.07, 146.0, 145.81, 145.5, 145.55, 145.4, 145.36, 145.06, 144.58, 143.86, 143.81, 143.7, 143.71, 142.86, 142.79, 142.73, 142.62, 142.12, 142.04, 139.44, 138.20, 136.29, 132.1, 127.46, 123.6, 123.6, 74.59, 50.68. FT-IR ν/cm<sup>-1</sup> (KBr) 1576, 1543, 1450, 1427, 1184, 1064, 887, 808, 740, 689, 589, 556, 526; UV-vis (CHCl<sub>3</sub>) λ<sub>max</sub>/nm 388, 431, 456, 689; HRMS (MALDI-TOF-MS, DCTB as matrix, negative mode): m/z [M]<sup>-</sup> calcd for C<sub>68</sub>H<sub>4</sub>ClN 869.0032; found 869.0029.

### Synthesis of 2d

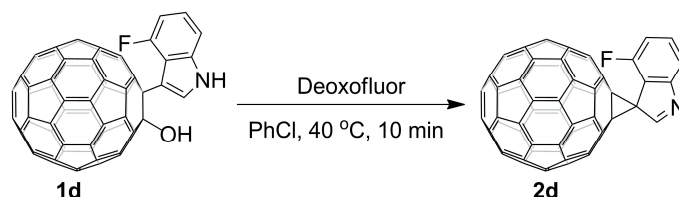

**1d** (17.4 mg, 0.02 mmol), Deoxofluor (36 μL, 0.20 mmol) were dissolved in chlorobenzene (5 mL) at 40°C under N<sub>2</sub> atmosphere. After 10 minutes of reaction, the

color of the solution changed gradually from brown to deep red. Then, petroleum ether was added to the mixture to precipitate the product. The residue was separated on a silica gel column with carbon disulfide/dichloromethane (2:1) as the eluent to give unreacted **1d** (2.0 mg) and **2d** (11.4 mg, 67 %) as black amorphous solid. <sup>1</sup>H NMR (400 MHz, CS<sub>2</sub>/d<sub>6</sub>-acetone) δ 9.12 (s, 1H), 7.73 (d, *J* = 7.6 Hz, 1H), 7.65-7.61 (m, 1H), 7.22 (t, *J* = 9.2 Hz, 1H); <sup>13</sup>C NMR (150 MHz, CS<sub>2</sub>/d<sub>6</sub>-acetone)(all 2C unless indicated) δ 167.43, 148.96, 147.67, 146.12, 146.05, 146.01, 145.97, 145.91, 145.57, 145.52, 145.48, 145.37, 144.69, 144.54, 144.04, 143.81, 143.7, 143.66, 143.63, 143.57, 142.79, 142.77, 142.47, 142.39, 142.29, 141.81, 141.46, 137.84, 132.00, 131.9, 119.79, 119.7, 115.72, 115.5, 73.28, 51.56. FT-IR ν/cm<sup>-1</sup> (KBr) 1624, 1590, 1556, 1508, 1476, 1424, 1240, 1185, 1001, 787, 740, 700, 556, 523; UV-vis (CHCl<sub>3</sub>) λ<sub>max</sub>/nm 386, 430, 457, 687; HRMS (MALDI-TOF-MS, DCTB as matrix, negative mode): m/z [M]<sup>-</sup> calcd for C<sub>68</sub>H<sub>4</sub>FN 853.0328; found 853.0331.

### Synthesis of **2e**

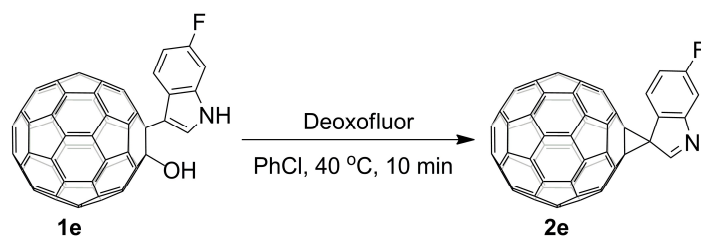

**1e** (17.4 mg, 0.02 mmol), Deoxofluor (36 μL, 0.20 mmol) were dissolved in chlorobenzene (5 mL) at 40°C under N<sub>2</sub> atmosphere. After 10 minutes of reaction, the color of the solution changed gradually from brown to deep red. Then, petroleum ether was added to the mixture to precipitate the product. The residue was separated on a silica gel column with carbon disulfide/dichloromethane (2:1) as the eluent to give unreacted **1e** (1.5 mg) and **2e** (11.1 mg, 65 %) as black amorphous solid. <sup>1</sup>H NMR (600 MHz, CS<sub>2</sub>/d<sub>6</sub>-DMSO) δ 9.66 (s, 1H), 8.71 (dd, *J* = 8.4, 5.4 Hz, 1H), 8.10 (dd, *J* = 8.4, 2.4 Hz, 1H), 7.70 (td, *J* = 8.4, 2.4 Hz, 1H); <sup>13</sup>C NMR (150 MHz, CS<sub>2</sub>/d<sub>6</sub>-acetone) (all 2C unless indicated) δ 168.61, 148.48, 146.51, 146.16, 146.07, 145.96, 145.72, 145.65, 145.60, 145.54, 145.49, 145.44, 144.67, 143.95, 143.89, 143.82, 143.78, 142.9, 142.88, 142.82, 142.74, 142.17, 142.09, 139.55, 138.29, 123.91, 123.84, 114.39, 114.23, 111.09, 110.93, 74.73, 50.66. FT-IR ν/cm<sup>-1</sup> (KBr) 1624, 1588, 1558, 1514, 1476, 1424, 1239, 1187, 1001, 790, 743, 702, 558, 526; UV-vis (CHCl<sub>3</sub>) λ<sub>max</sub>/nm 388, 430, 459, 686. HRMS (MALDI-TOF-MS, DCTB as matrix, negative mode): m/z [M]<sup>-</sup> calcd for C<sub>68</sub>H<sub>4</sub>FN 853.0328; found 853.0334.

## 2. NMR Spectra of 2a-2e

### <sup>1</sup>H NMR (400 MHz, CS<sub>2</sub>/d<sub>6</sub>-acetone) of compound 2a

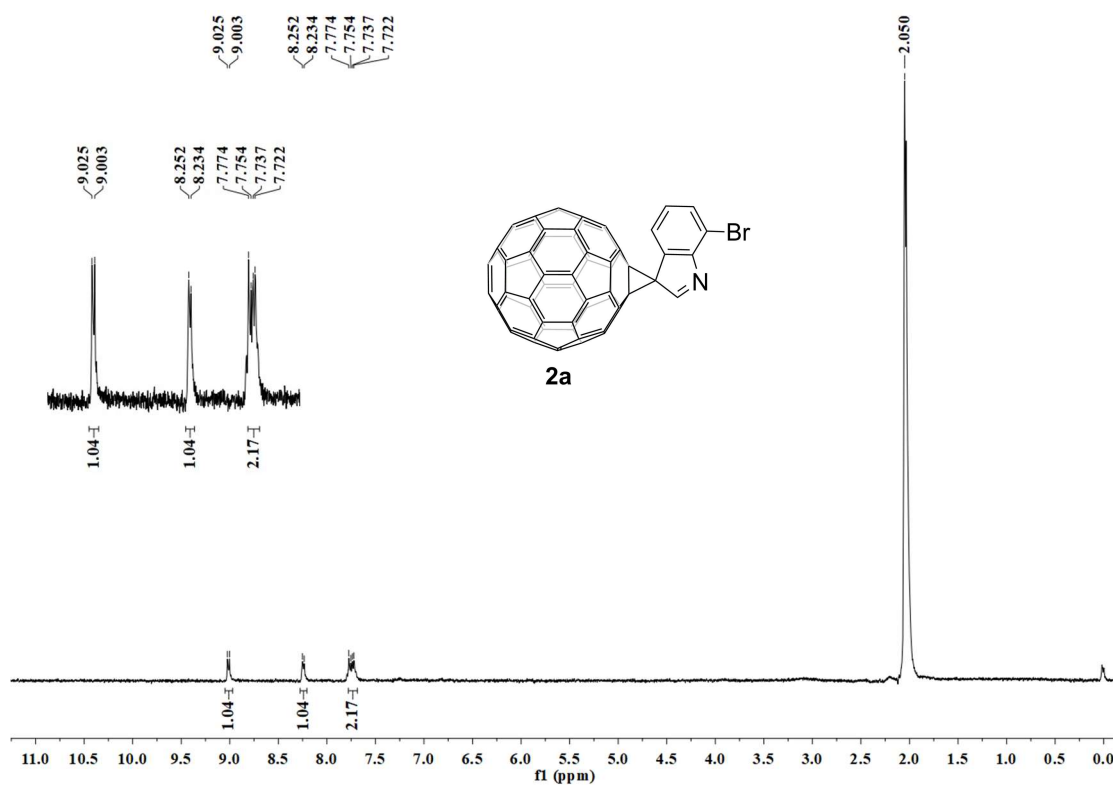

### <sup>13</sup>C NMR (150 MHz, CS<sub>2</sub>/d<sub>6</sub>-acetone) of compound 2a

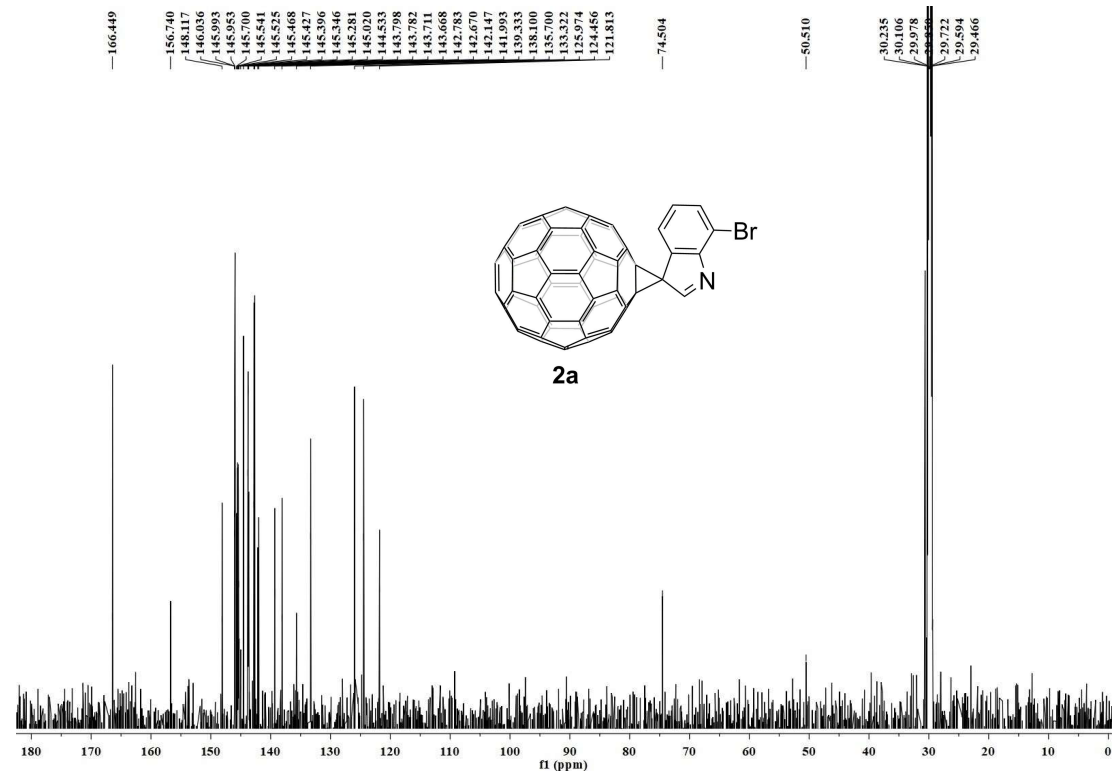

### $^1\text{H}$ NMR (400 MHz, $\text{CS}_2/d_6$ -acetone) of compound 2b

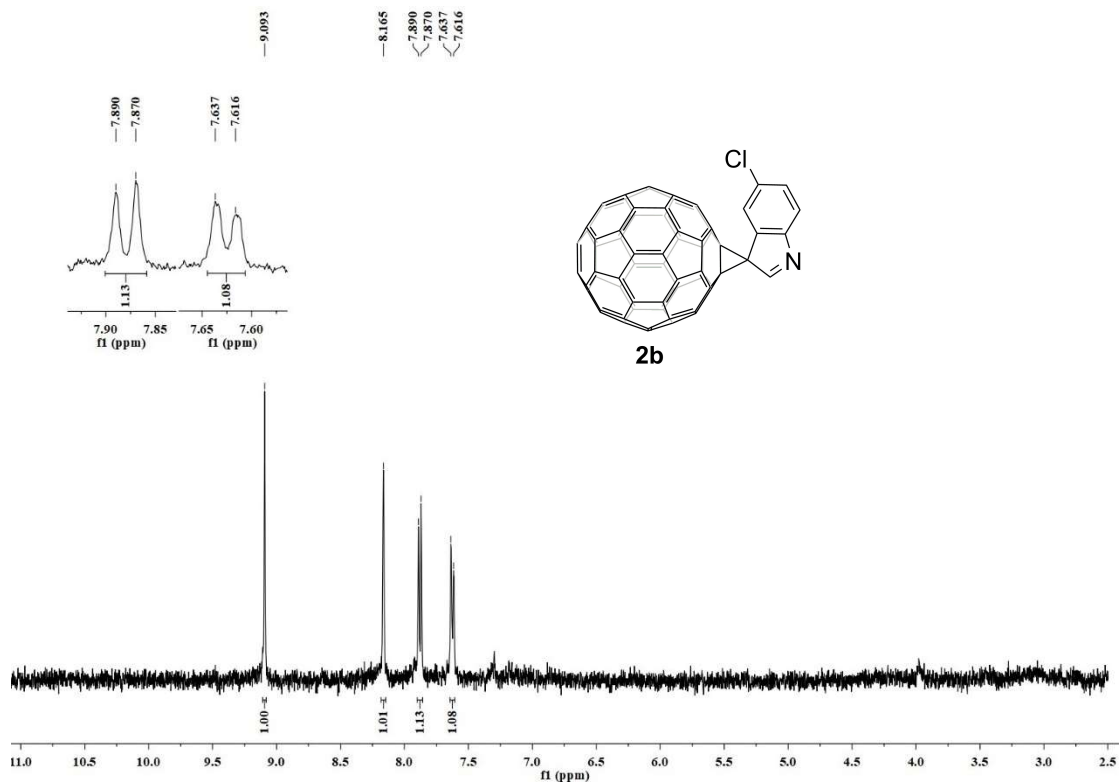

### $^{13}\text{C}$ NMR (150 MHz, $\text{CS}_2/d_6$ -acetone) of compound 2b

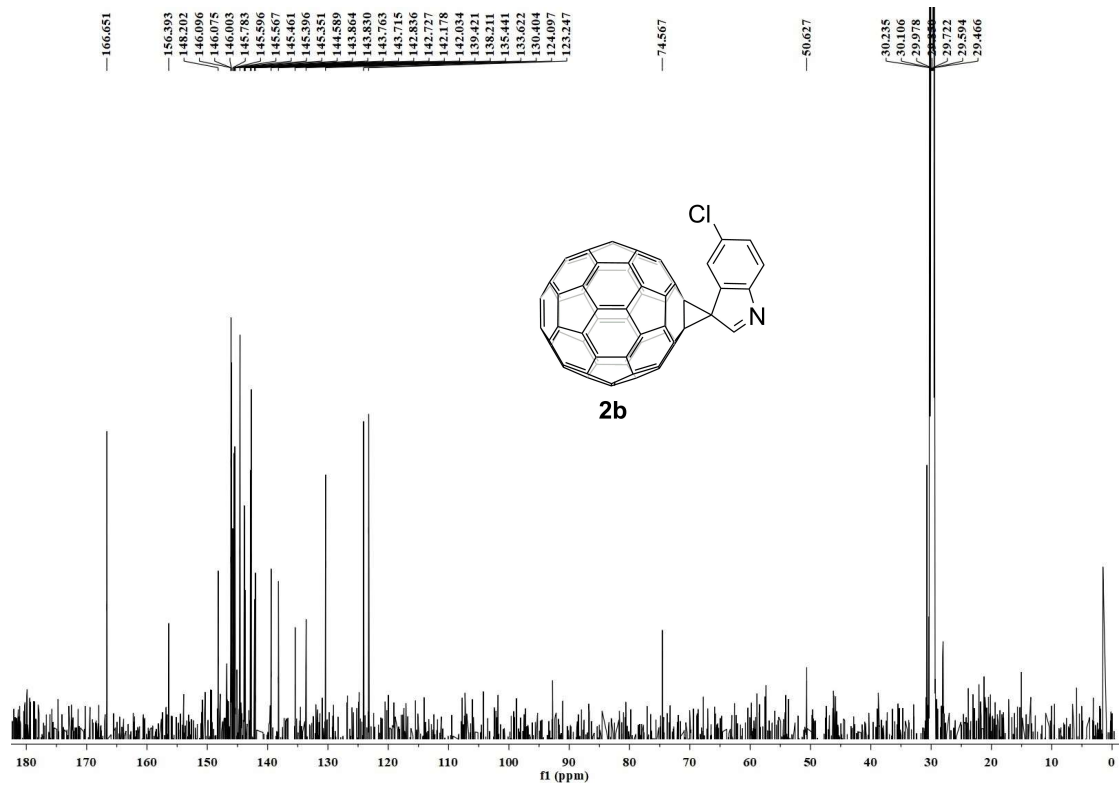

### $^1\text{H}$ NMR (400 MHz, $\text{CS}_2/d_6$ -acetone) of compound **2c**

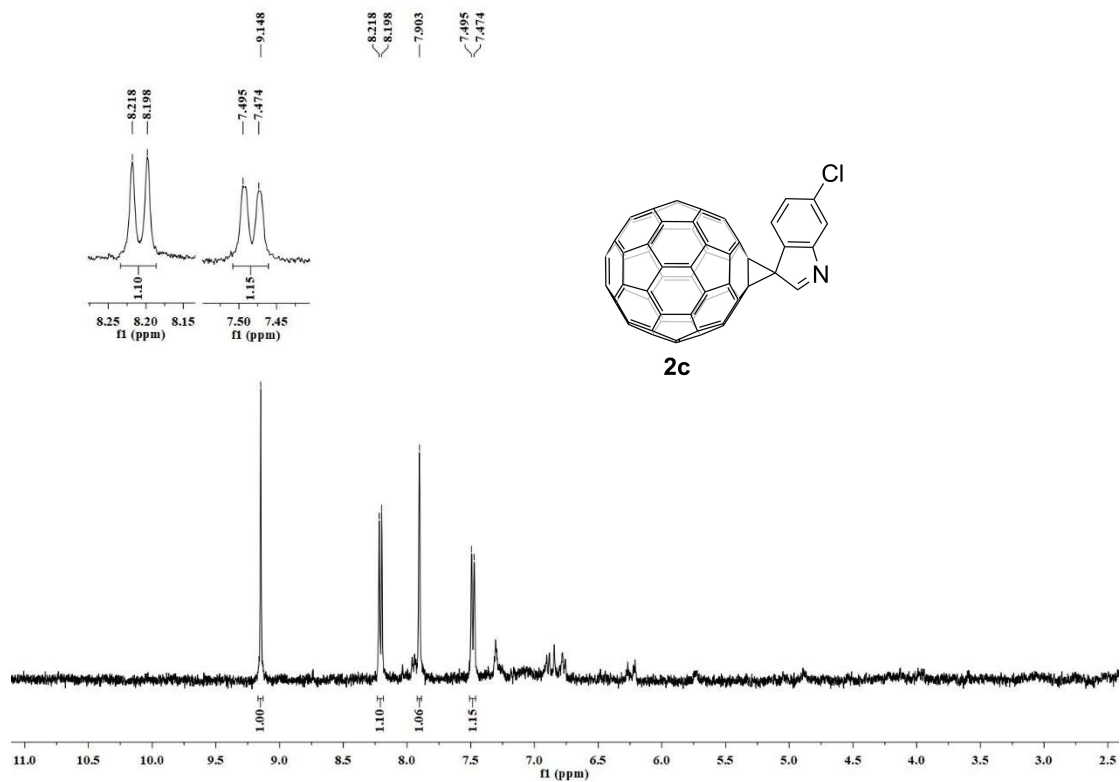

### $^{13}\text{C}$ NMR (150 MHz, $\text{CS}_2/d_6$ -acetone) of compound **2c**

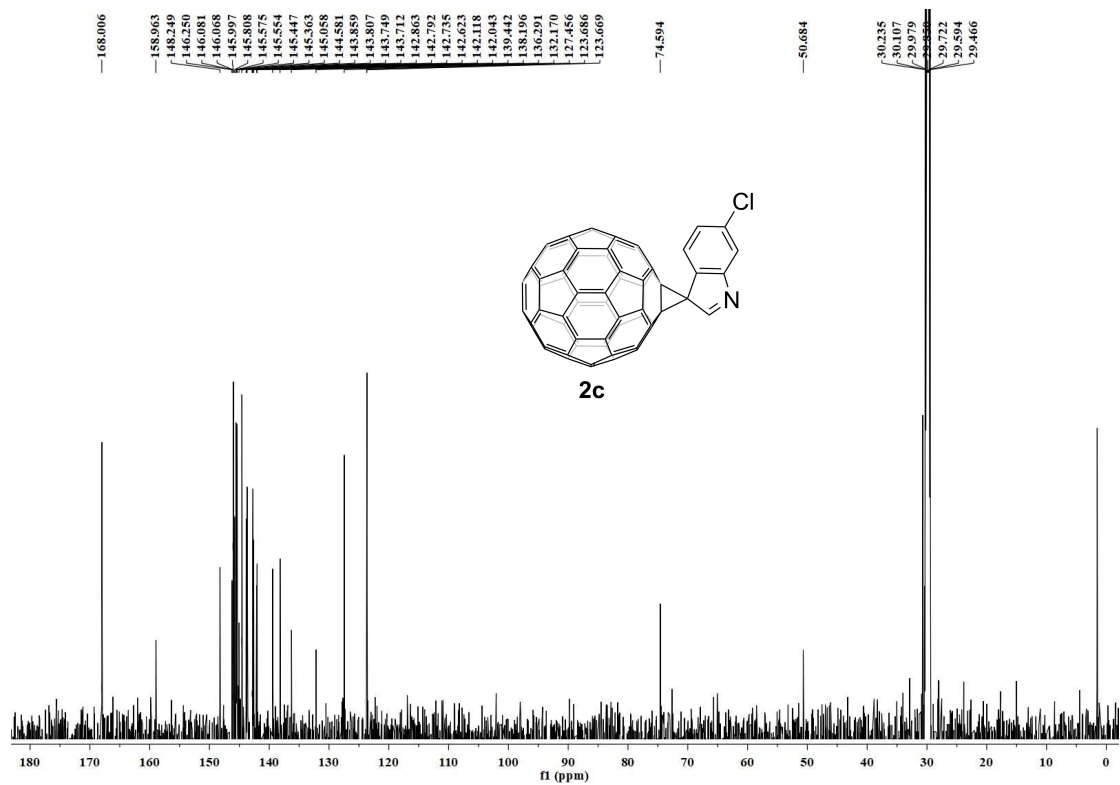

### $^1\text{H}$ NMR (400 MHz, $\text{CS}_2/d_6$ -acetone) of compound 2d

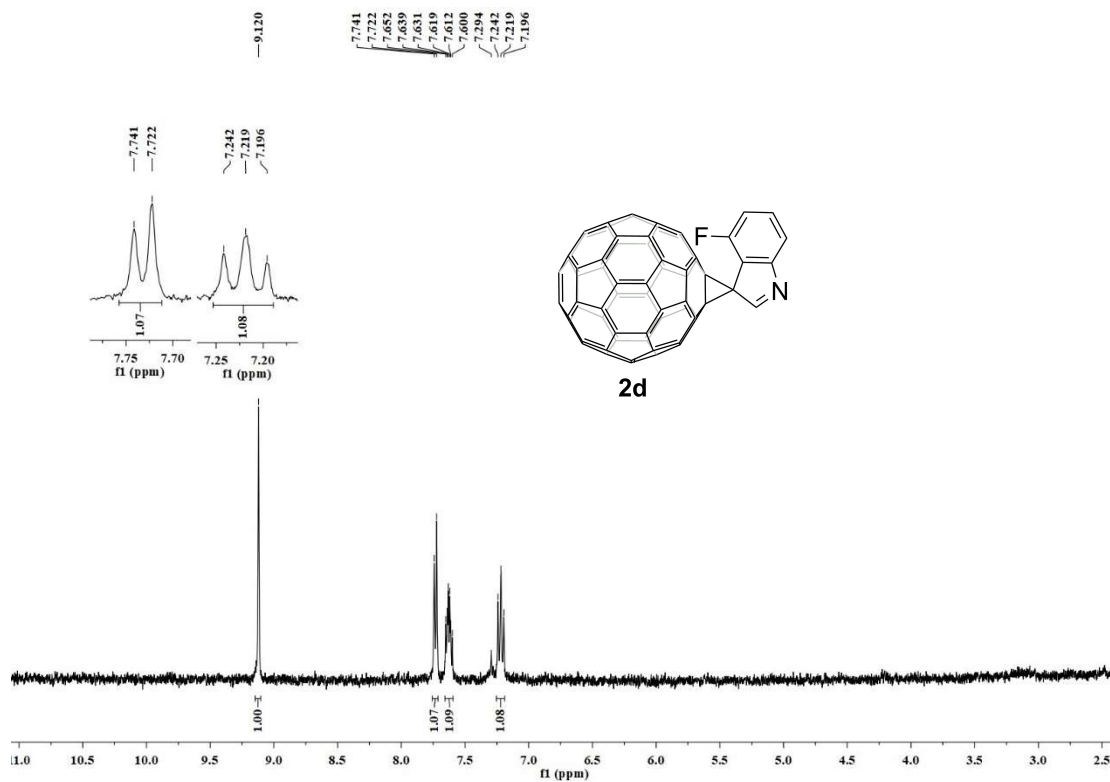

### $^{13}\text{C}$ NMR (150 MHz, $\text{CS}_2/d_6$ -acetone) of compound 2d

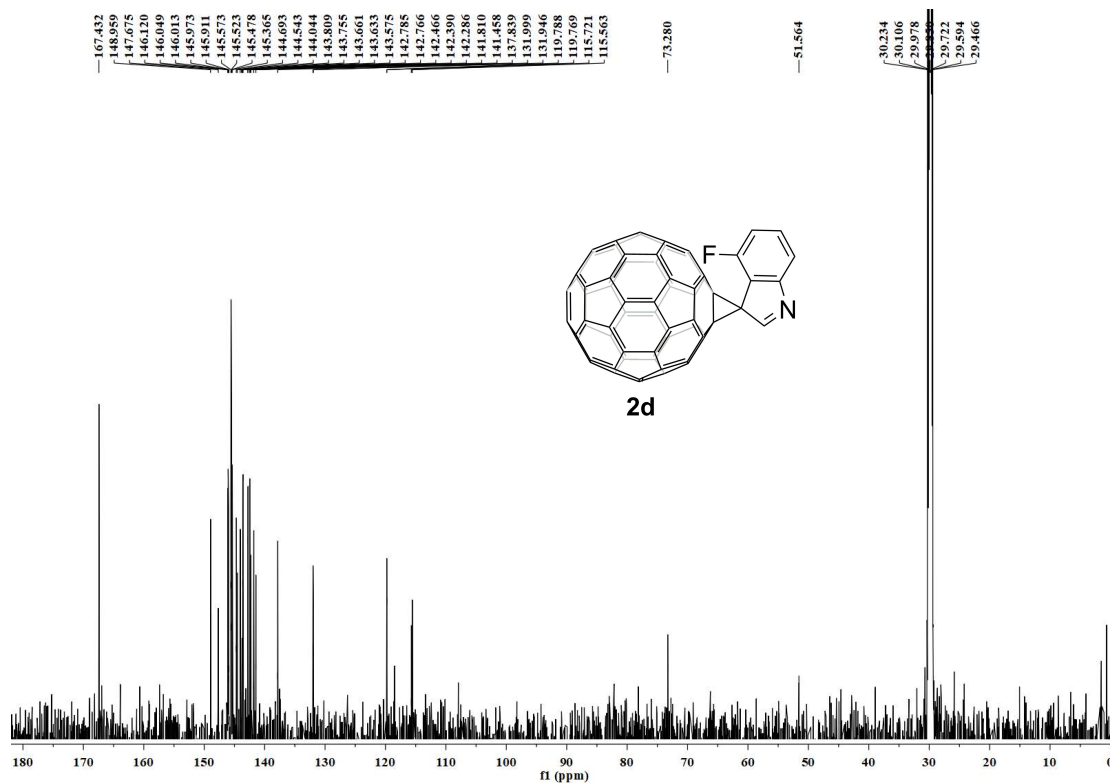



### <sup>1</sup>H NMR (400 MHz, CS<sub>2</sub>/d<sub>6</sub>-DMSO) of compound 2e

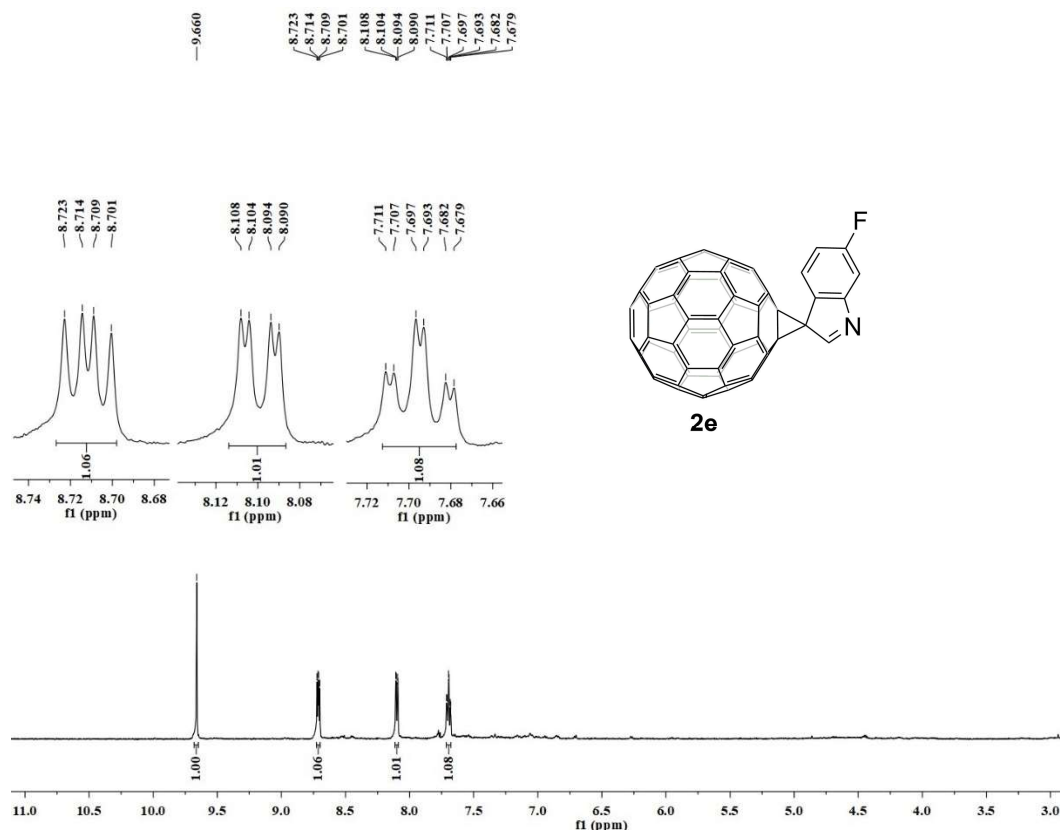

### <sup>13</sup>C NMR (150 MHz, CS<sub>2</sub>/d<sub>6</sub>-acetone) of compound 2e

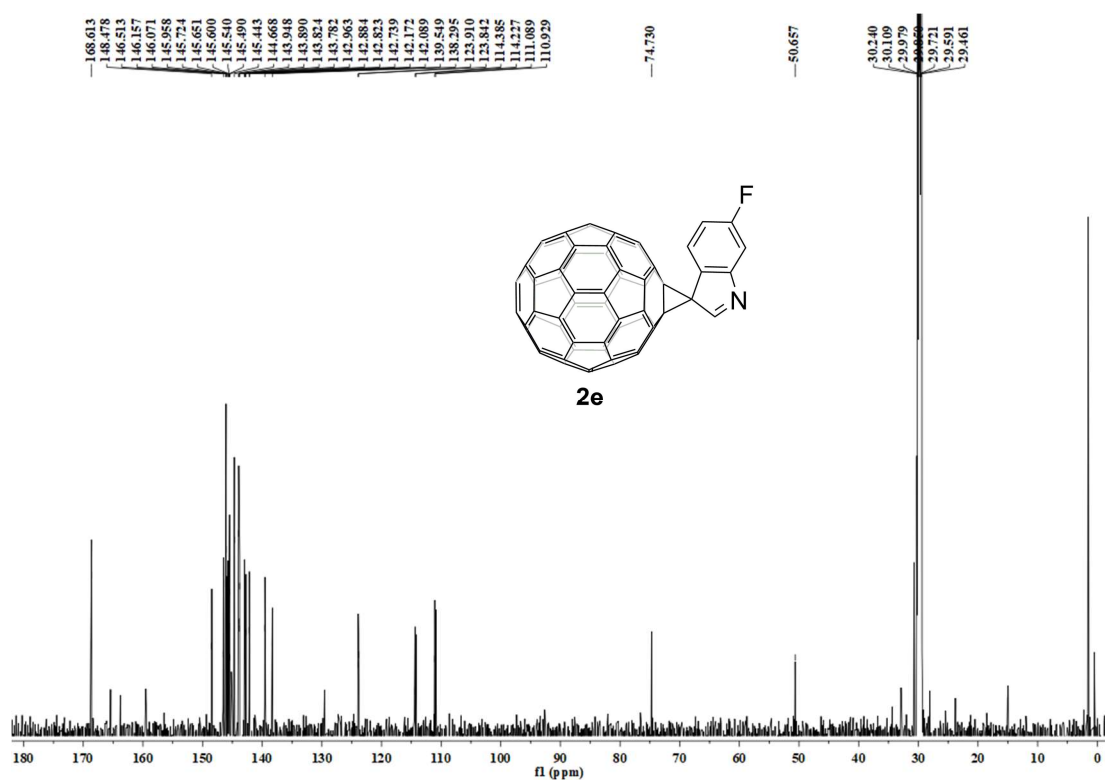

### 3. Single-Crystal X-Ray Crystallography of 2a

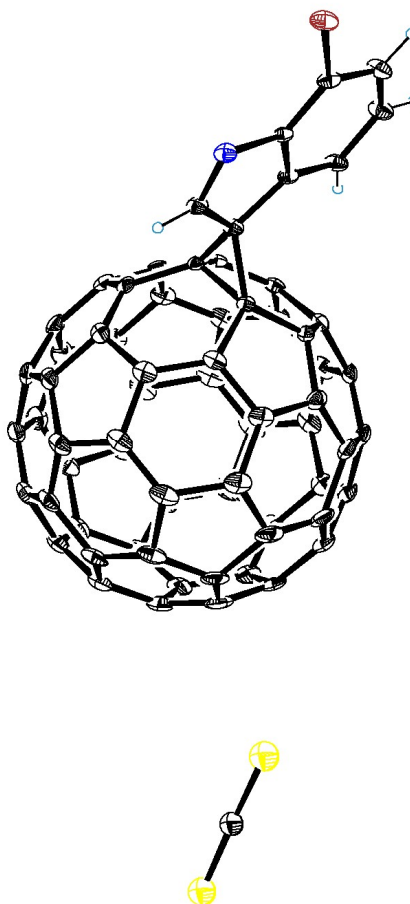

**Figure S1** ORTEP diagram of **2a** with 20% thermal ellipsoids.

Black block crystals of **2a** suitable for X-ray diffraction were obtained from the slow evaporation of a solution containing CS<sub>2</sub> and *n*-hexane. Single-crystal X-ray diffraction data were collected on a diffractometer (DECTRIS PILATUS 300K, STOE & Cie GmbH) equipped with a CCD area detector using graphite-monochromated Cu K $\alpha$  radiation ( $\lambda = 1.54184$  Å). The structure was solved with direct methods using SHELXS-97 and refined with full-matrix least-squares refinement using the SHELXL-97 program within OLEX2. Crystallographic data have been deposited in the Cambridge Crystallographic Data Centre as deposition number CCDC 2298884.

| Table 1 Crystal data and structure refinement for 2a |                                                                |
|------------------------------------------------------|----------------------------------------------------------------|
| Identification code                                  | 2a                                                             |
| Empirical formula                                    | C <sub>68</sub> H <sub>4</sub> BrN <sub>2</sub> S <sub>2</sub> |
| Formula weight                                       | 992.76                                                         |
| Temperature/K                                        | 293(2)                                                         |
| Crystal system                                       | monoclinic                                                     |
| Space group                                          | P2 <sub>1</sub> /c                                             |
| a/Å                                                  | 17.9648(10)                                                    |
| b/Å                                                  | 14.7598(7)                                                     |

|                                                |                                                                        |
|------------------------------------------------|------------------------------------------------------------------------|
| c/Å                                            | 13.8606(8)                                                             |
| $\alpha/^\circ$                                | 90                                                                     |
| $\beta/^\circ$                                 | 100.983(4)                                                             |
| $\gamma/^\circ$                                | 90                                                                     |
| Volume/Å <sup>3</sup>                          | 3607.9(3)                                                              |
| Z                                              | 4                                                                      |
| $\rho_{\text{calc}}/\text{cm}^3$               | 1.828                                                                  |
| $\mu/\text{mm}^{-1}$                           | 3.127                                                                  |
| F(000)                                         | 1972.0                                                                 |
| Crystal size/mm <sup>3</sup>                   | 0.03 × 0.02 × 0.01                                                     |
| Radiation                                      | CuK $\alpha$ ( $\lambda = 1.54186$ )                                   |
| 2 $\Theta$ range for data collection/ $^\circ$ | 10.032 to 138.802                                                      |
| Index ranges                                   | -21 $\leq$ h $\leq$ 21, -17 $\leq$ k $\leq$ 10, -16 $\leq$ l $\leq$ 13 |
| Reflections collected                          | 20007                                                                  |
| Independent reflections                        | 6585 [ $R_{\text{int}} = 0.0575$ , $R_{\text{sigma}} = 0.0577$ ]       |
| Data/restraints/parameters                     | 6585/0/643                                                             |
| Goodness-of-fit on F <sup>2</sup>              | 1.044                                                                  |
| Final R indexes [ $ I  > 2\sigma(I)$ ]         | $R_1 = 0.0752$ , $wR_2 = 0.1970$                                       |
| Final R indexes [all data]                     | $R_1 = 0.1087$ , $wR_2 = 0.2269$                                       |
| Largest diff. peak/hole / e Å <sup>-3</sup>    | 1.28/-1.30                                                             |

## 5. UV-vis absorption spectra of compounds 2a-2e

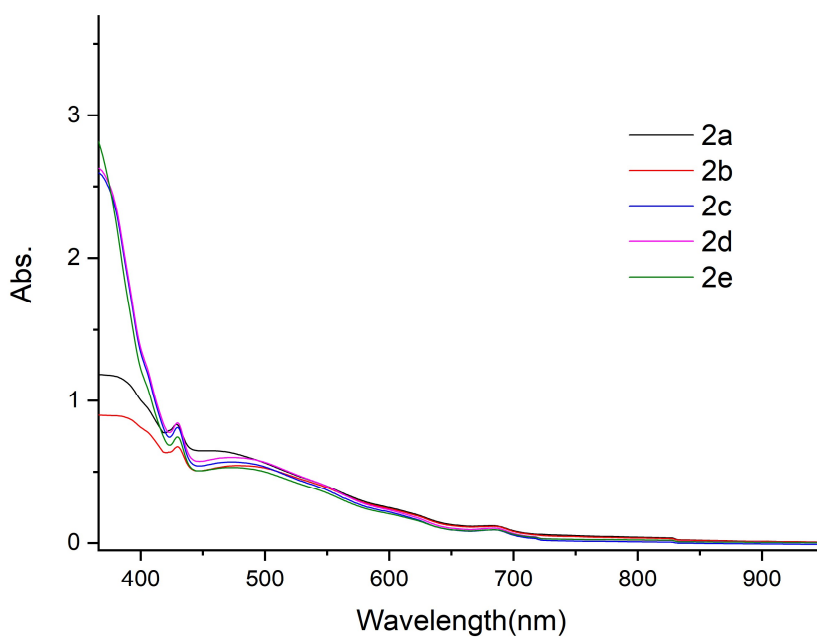

**Figure S2.** UV-vis spectra of **2a-2e** in CHCl<sub>3</sub>
